# Supplementary material
Source: publisher figshare collection journal article supplement (https://tandf.figshare.com/articles/dataset/_/20115896)
Supplement: Supplementary file 1 [file 1]

Archive with 5 entries (5 files):
- ystw_a_2091343_sm8071.mp4
- ystw_a_2091343_sm8068.mp4
- ystw_a_2091343_sm8067.mp4
- ystw_a_2091343_sm8066.mp4
- ystw_a_2091343_sm8057.pdf
