# Supplementary material
Source: publisher figshare collection journal article supplement (https://tandf.figshare.com/articles/dataset/_/20115896)
Supplement: Supplementary file 1 [file 1 › ystw_a_2091343_sm8057.pdf]

# **Numerical investigation of asymmetric weld fusion geometry in laser welding of aluminium alloy with beam oscillation**

Xi Chen<sup>a, 1</sup>, Nan Jiang<sup>a, 1</sup>, Meng Jiang<sup>a, 1, \*</sup>, Yang Du<sup>b</sup>, Shengchong Ma<sup>a</sup>, Yuan Chen<sup>a</sup>, Caiwang Tan<sup>a</sup>, Zhenglong Lei<sup>a</sup>, Sicong Zhao<sup>c</sup> and Yanbin Chen<sup>a, \*</sup>

*<sup>a</sup>State Key Laboratory of Advanced Welding and Joining, Harbin Institute of Technology, Harbin, 150001, China*

*<sup>b</sup>Department of Materials Science and Engineering, The Pennsylvania State University, University Park, PA 16802, USA*

*<sup>c</sup>School of Materials Science and Engineering, Harbin University of Science and Technology, Harbin 150040, China*

\*Corresponding author: M. Jiang (mengjiang@hit.edu.cn), Y.B. Chen (chenyb@hit.edu.cn)

<sup>1</sup> These authors contributed to this work equally.

## **Supplementary information includes:**

1. Fresnel absorption model
2. Multi-reflection model

## 1. Fresnel absorption model

The laser energy is absorbed by the keyhole wall through Fresnel absorption, and the rest is reflected. The absorption rate  $\alpha$  can be described as:

$$\alpha = 1 - \frac{1}{2} \left( \frac{1 + (1 - \varepsilon \cos \varphi)^2}{1 + (1 + \varepsilon \cos \varphi)^2} + \frac{\varepsilon^2 - 2\varepsilon \cos \varphi + 2 \cos^2 \varphi}{\varepsilon^2 + 2\varepsilon \cos \varphi + 2 \cos^2 \varphi} \right) \quad (S1)$$

where,  $\varphi$  is the angle between the incident ray  $x_i$  and the surface normal  $n$ ,  $\varepsilon$  is an electrical conductance coefficient dependent on the laser type and material properties, which can be expressed as:

$$\varepsilon^2 = \frac{2\varepsilon_2}{\varepsilon_1 + \left[ \varepsilon_1^2 + \left( \frac{\sigma}{\omega \varepsilon_0} \right)^2 \right]^{\frac{1}{2}}} \quad (S2)$$

where  $\varepsilon_0$ ,  $\varepsilon_1$ ,  $\varepsilon_2$  is the relative permittivity of vacuum, plasma, and base material, respectively.  $\omega$  is the laser angular frequency, and  $\sigma$  is the electrical conductance per unit depth of metal.

## 2. Multi-reflection model

To accurately describe the laser-materials interaction during laser welding, the laser beam is divided into many beam bundles. In the model, a ray-tracing algorithm is adopted to consider multi-reflection inside the keyhole. When the beam impinges on the keyhole wall, some of laser energy is absorbed by Fresnel mechanism, and the other is reflected on the keyhole wall.  $x_i$ ,  $n$ ,  $x_r$  are incident ray, the surface normal, and reflected ray, respectively. The  $x_r$  is expressed using the following equation:

$$x_r = x_i - 2(x_i \cdot n) \quad (S3)$$

In the laser heat source model, the ray tracing will be terminated when the energy of reflected ray is lower than 1% of the energy of original ray or it escapes out of the keyhole.
